# Supplementary material for: Large-scale synthesis of Cu2SnS3 and Cu1.8S hierarchical microspheres as efficient counter electrode materials for quantum dot sensitized solar cells
Source: Royal Society of Chemistry journal article supplement (doi:10.1039/c2nr31724a), 2012-01-01
Supplement: c2nr31724a.pdf [file c2nr31724a.pdf]

## Electronic Supplementary Information

### **Large-scale synthesis of $\text{Cu}_2\text{SnS}_3$ and $\text{Cu}_{1.8}\text{S}$ hierarchical microspheres as efficient counter electrode materials for quantum dot sensitized solar cells**

Jun Xu, Xia Yang, Tai-Lun Wong and Chun-Sing Lee\*

Department of Physics and Materials Science, and Center of Super-Diamond and Advanced Films (COSDAF), City University of Hong Kong, Hong Kong SAR, (P. R. China)

\* To whom all correspondences should be addressed. E-mail: [apcslee@cityu.edu.hk](mailto:apcslee@cityu.edu.hk) (C.S. Lee)

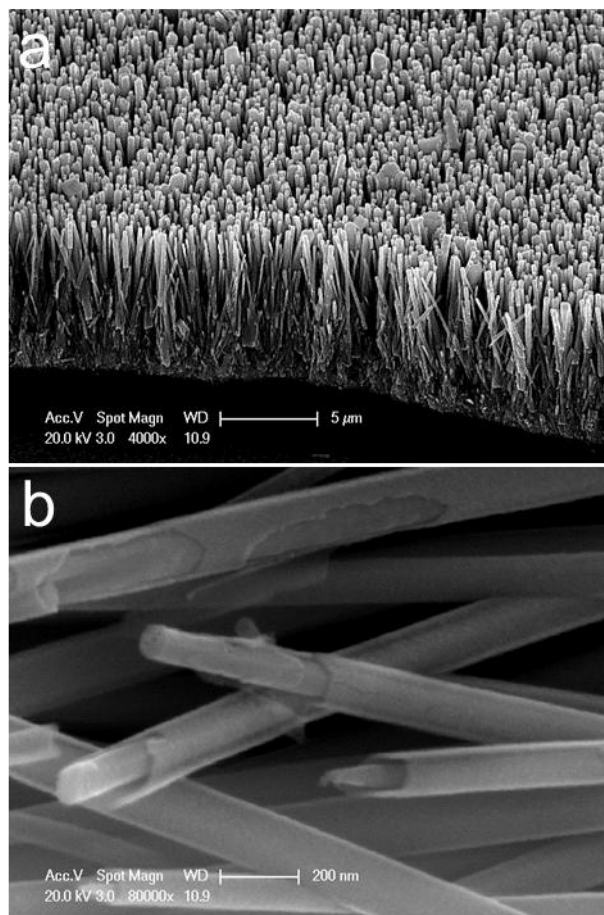

Fig. S1 (a) SEM image of an array of ZnO/ZnSe/CdSe core/shell nanocables, showing the nanocables with lengths of  $\sim 7 \mu\text{m}$  and diameters of 150–200 nm; (b) SEM image of some broken nanocables, showing the core/shell structure.

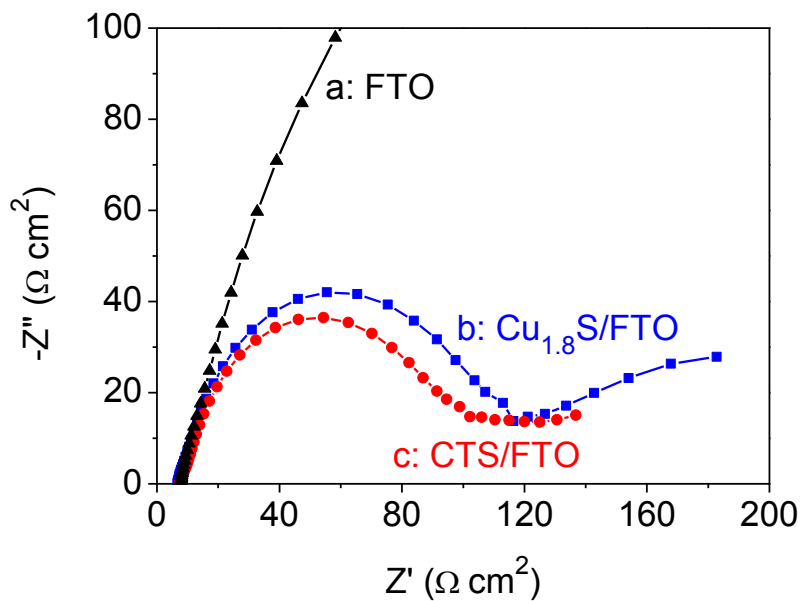

Fig. S2 Nyquist plots of real solar cells containing the same photoanode of ZnO/ZnSe/CdSe nanocables and various counter electrodes of (a) FTO, (b)  $\text{Cu}_{1.8}\text{S}/\text{FTO}$ , and (c)  $\text{CTS}/\text{FTO}$ . The result reveals that  $R_{\text{ct}}$  value of the  $\text{CTS}/\text{FTO}$ -based solar cell is much smaller than that of the  $\text{Cu}_{1.8}\text{S}/\text{FTO}$ -based solar cell.
